# Supplementary material
Source: PubMed Central journal article supplement (PMC4779315)
Supplement: NIHMS763268-supplement-Suppl_.pdf [file NIHMS763268-supplement-Suppl_.pdf]

## Supporting Information

### Denoising Stimulated Raman Spectroscopic Images by Total Variation Minimization

Chien-Sheng Liao<sup>#,1</sup>, Joon Hee Choi<sup>#,2</sup>, Delong Zhang<sup>#,1</sup>,

Stanley H. Chan<sup>\*2,3</sup>, Ji-Xin Cheng<sup>\*1,2,4,5,6</sup>

<sup>1</sup>Weldon School of Biomedical Engineering, <sup>2</sup>School of Electrical and Computer Engineering, <sup>3</sup>Department of Statistics, <sup>4</sup>Department of Chemistry, <sup>5</sup>Purdue University Center for Cancer Research, <sup>6</sup>Birck Nanotechnology Center, Purdue University, West Lafayette, IN 47907, USA

# equal contributions

\*corresponding authors

### Supporting Figures

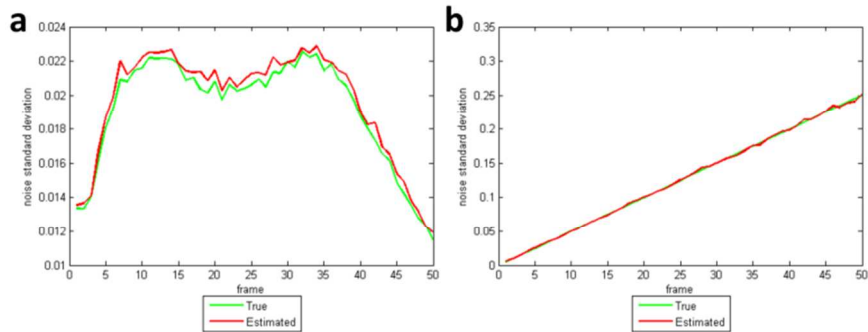

Figure S1: Noise estimation by STV algorithm. The true noise level was in green and the estimated noise level was in red. The x-axis was the frame number. The y-axis was the normalized noise level defined as the standard deviation of the background, where we normalized the signal to the interval [0, 1]. Each value shown on the y-axis corresponded to the percentage of noise compared to the signal level. (a) and (b) were corresponding to two different spectrally varying noise patterns.

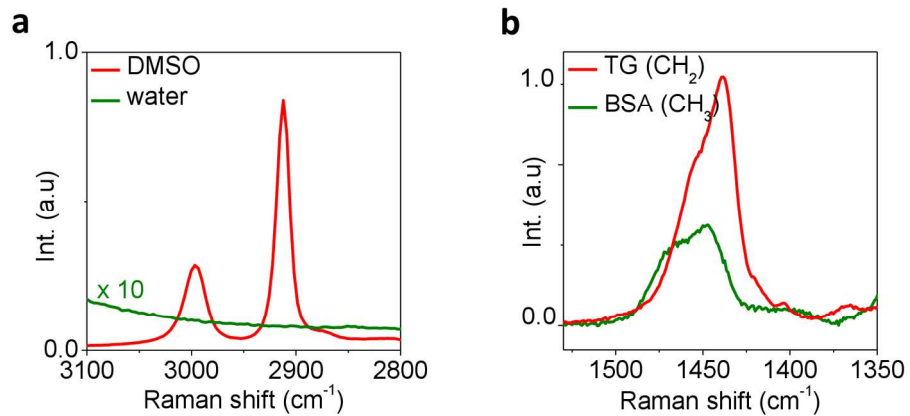

Figure S2: The spontaneous Raman spectra of (a) 100% DMSO solution and water. (b) Triglyceride (rich in  $\text{CH}_2$ ) and bovine serum albumin (rich in  $\text{CH}_3$ ).

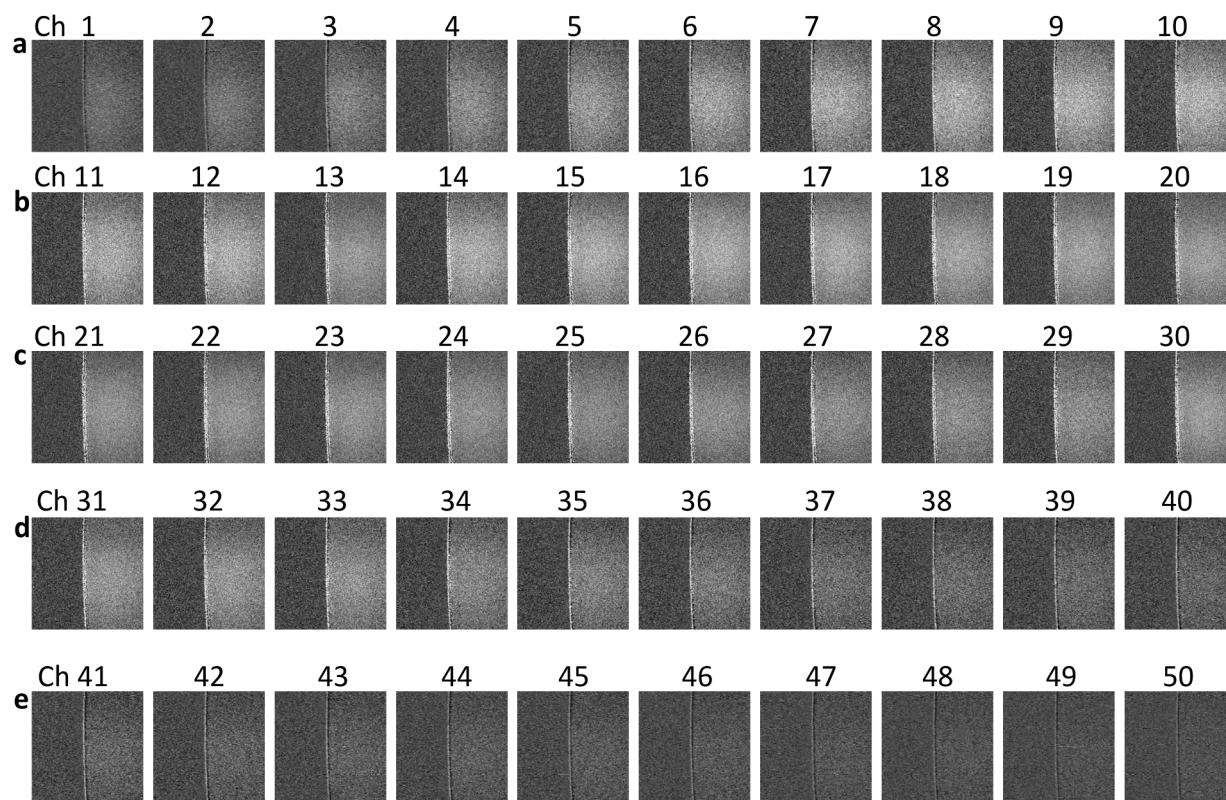

Figure S3: Raw spectroscopic images of 0.2% DMSO solution and air interface. (a) Spectral channel 1~8. (b) Channel 9~16. (c) Channel 17~24. (d) Channel 25~32.

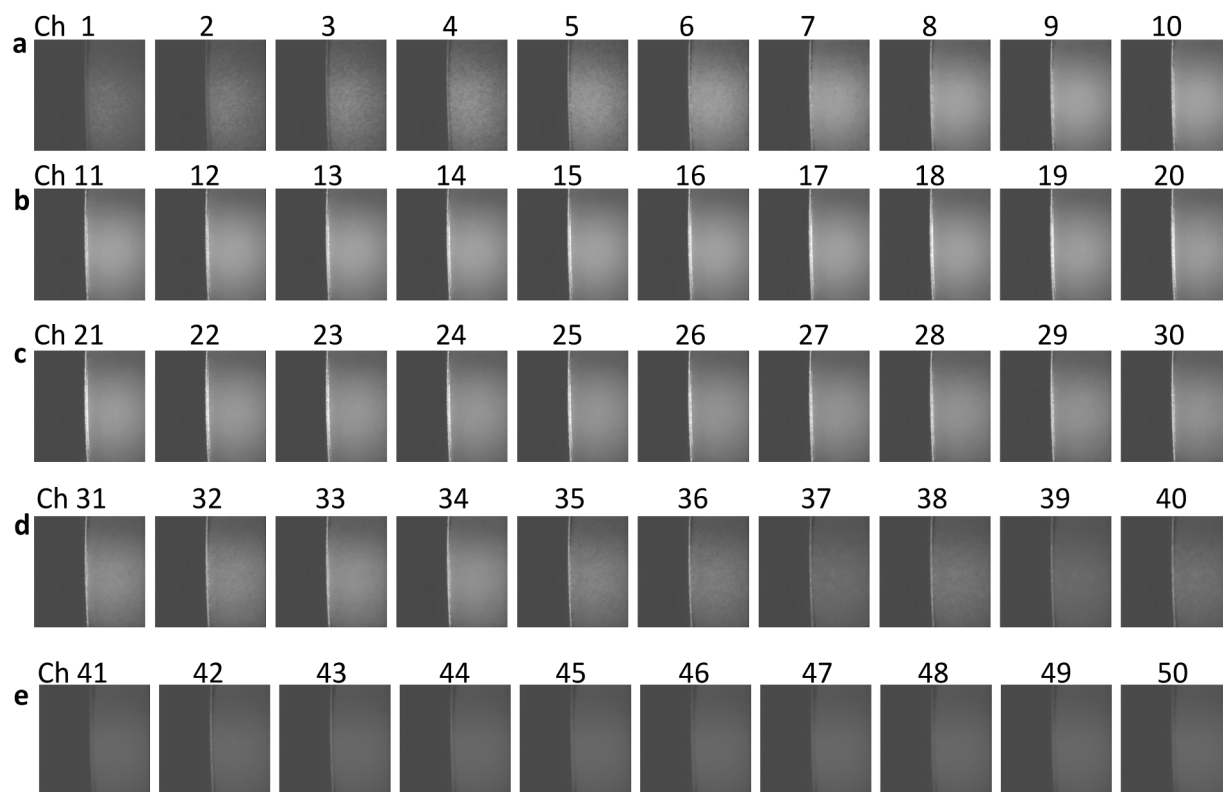

Figure S4: Denoised spectroscopic images of 0.2% DMSO solution and air interface by STV. (a) Spectral channel 1~10. (b) Channel 11~20. (c) Channel 21~30. (d) Channel 31~40. (e) Channel 41~50.

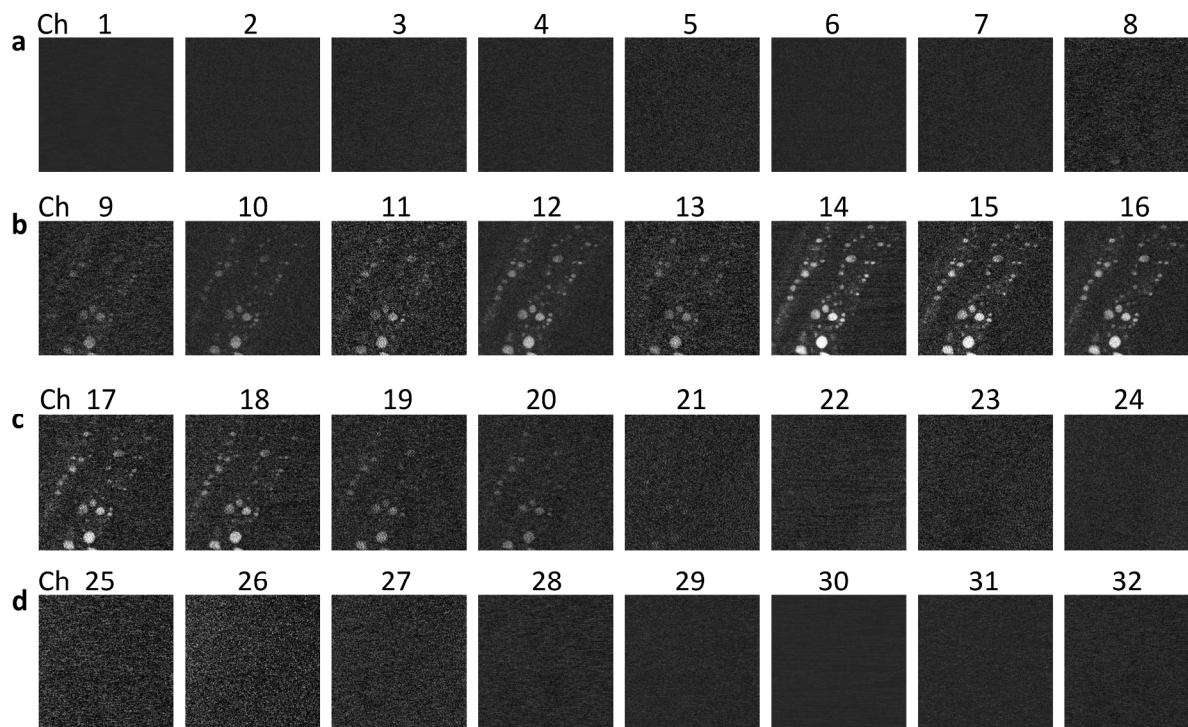

Figure S5: Raw spectroscopic images of *C. elegans*. (a) Spectral channel 1~8. (b) Channel 9~16. (c) Channel 17~24. (d) Channel 25~32.

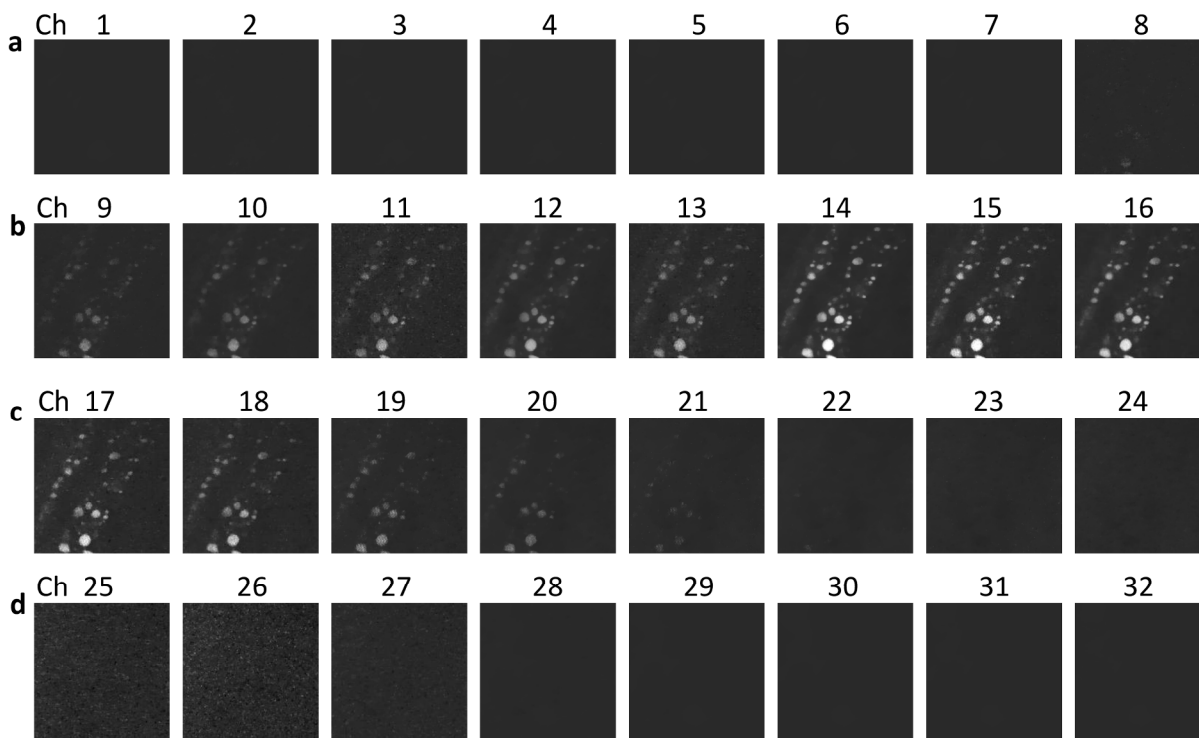

Figure S6: Denoised spectroscopic images of *C. elegans* by STV. (a) Spectral channel 1~8. (b) Channel 9~16. (c) Channel 17~24. (d) Channel 25~32.

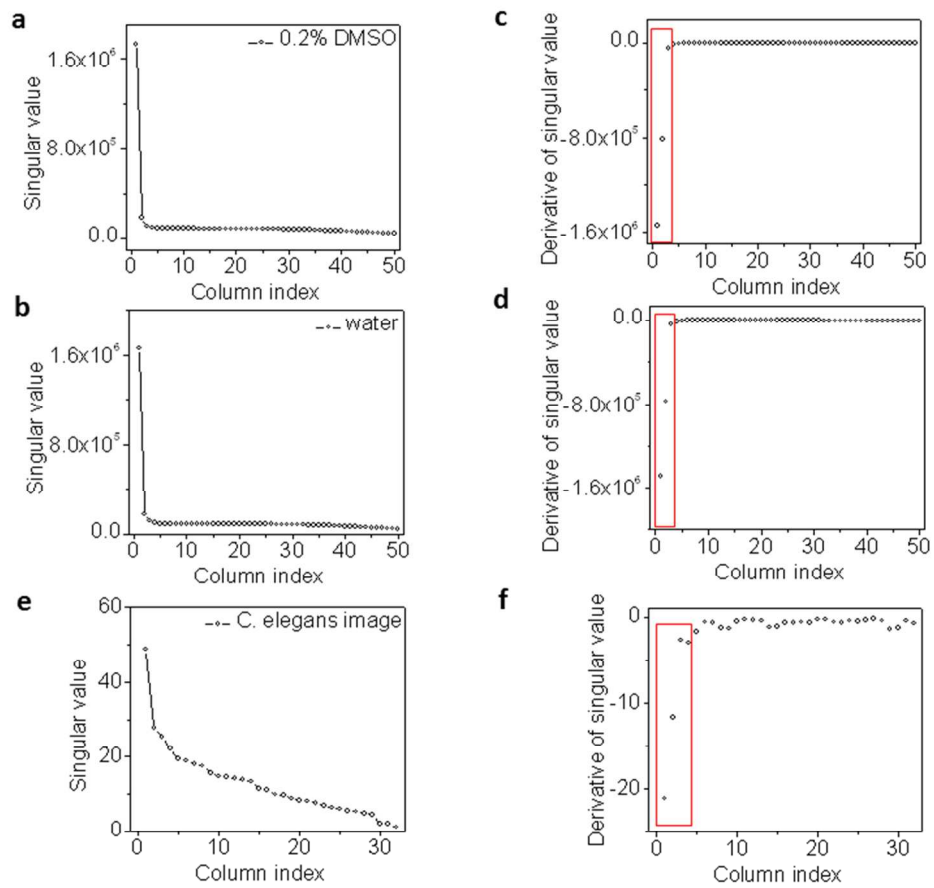

Figure S7: Singular values of SRS spectroscopic images of (a) 0.2% DMSO solution. (b) Derivative of (a). (c) water. (d) Derivative of (c). (e) *C. elegans*. (f) Derivative of (e)

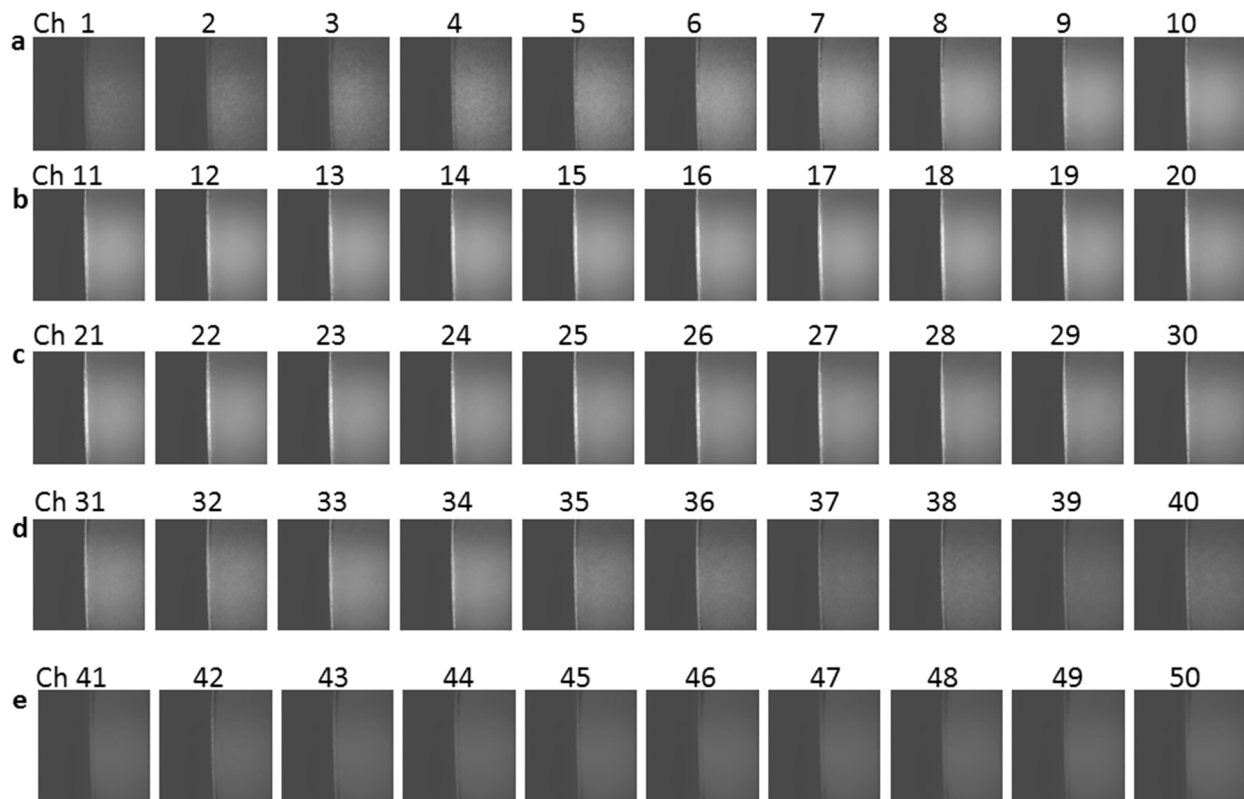

Figure S8: Denoised spectroscopic images of 0.2% DMSO solution and air interface by SVD. (a) Spectral channel 1~10. (b) Channel 11~20. (c) Channel 21~30. (d) Channel 31~40. (e) Channel 41~50.



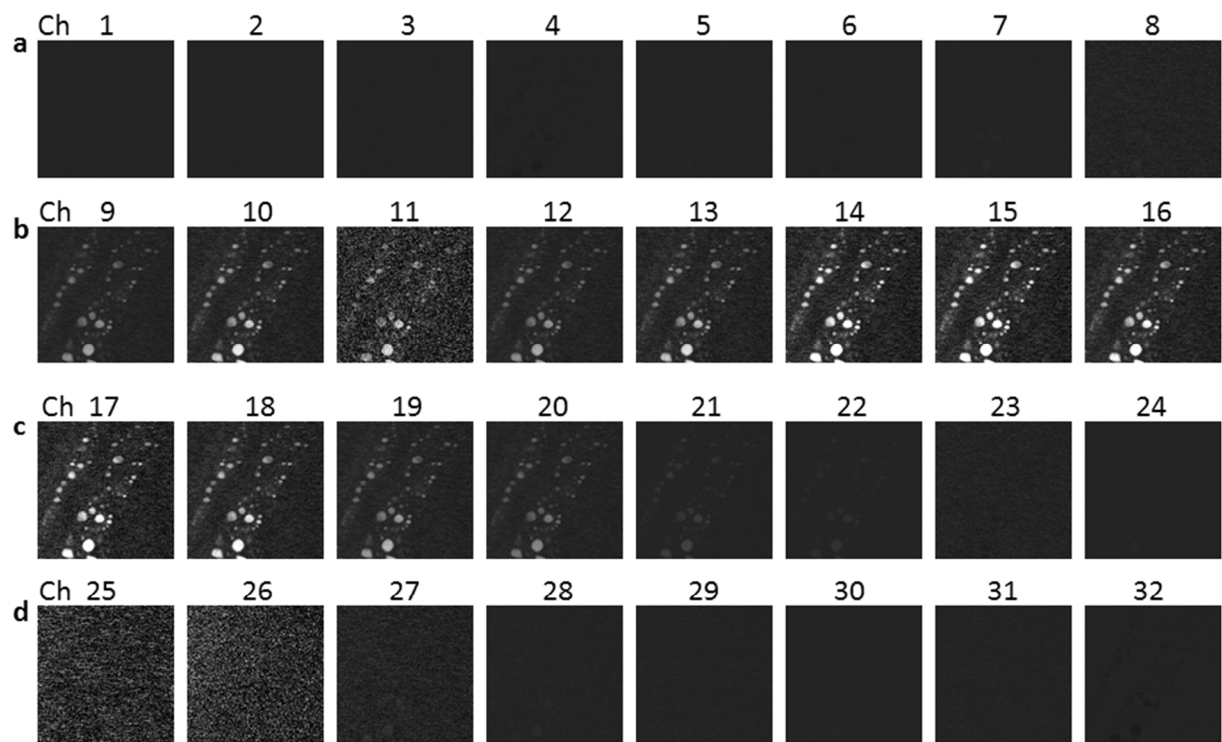

Figure S9: Denoised spectroscopic images of *C. elegans* by SVD. (a) Spectral channel 1~8. (b) Channel 9~16. (c) Channel 17~24. (d) Channel 25~32.
